# Supplementary material for: Lorlatinib Effectiveness and Quality-of-Life in Patients with ALK-Positive NSCLC Who Had Failed Second-Generation ALK Inhibitors: Canadian Real-World Experience
Source: MDPI journal article supplement (doi:10.3390/curroncol30070481), 2023-07-08
Supplement: s1 [file s1]

**List of countries in which lorlatinib received positive reimbursement recommendation as a second-line or subsequent lines of therapy in ALK-positive metastatic NSCLC**

|    | Country        | Reference                                                                                                                                                                                                                                                                                                                         |
|----|----------------|-----------------------------------------------------------------------------------------------------------------------------------------------------------------------------------------------------------------------------------------------------------------------------------------------------------------------------------|
| 1  | UK             | <a href="https://www.nice.org.uk/guidance/indevelopment/gid-ta10317">https://www.nice.org.uk/guidance/indevelopment/gid-ta10317</a>                                                                                                                                                                                               |
| 2  | Germany        | <a href="https://www.g-ba.de/bewertungsverfahren/nutzenbewertung/464/">https://www.g-ba.de/bewertungsverfahren/nutzenbewertung/464/</a>                                                                                                                                                                                           |
| 3  | France         | <a href="https://www.has-sante.fr/jcms/p_3146314/fr/lorviqua">https://www.has-sante.fr/jcms/p_3146314/fr/lorviqua</a>                                                                                                                                                                                                             |
| 4  | Italy          | <a href="#">Gazzetta Ufficiale</a>                                                                                                                                                                                                                                                                                                |
| 5  | Spain          | <a href="https://www.aemps.gob.es/medicamentosUsoHumano/informesPublicos/docs/2021/IPT_6-2021-Lorviqua.pdf?x69995">https://www.aemps.gob.es/medicamentosUsoHumano/informesPublicos/docs/2021/IPT_6-2021-Lorviqua.pdf?x69995</a>                                                                                                   |
| 6  | Poland         | <a href="https://bipold.aotm.gov.pl/assets/files/zlecenia_mz/2020/085/REK/24%2008%202020%20rekomendacja%20nr%2044%20Lorviqua.pdf">https://bipold.aotm.gov.pl/assets/files/zlecenia_mz/2020/085/REK/24%2008%202020%20rekomendacja%20nr%2044%20Lorviqua.pdf</a>                                                                     |
| 7  | Australia      | <a href="http://www.pbs.gov.au/industry/listing/elements/pbac-meetings/pbac-outcomes/2019-11/positive-recommendations-11-2019.docx.pdf">http://www.pbs.gov.au/industry/listing/elements/pbac-meetings/pbac-outcomes/2019-11/positive-recommendations-11-2019.docx.pdf</a>                                                         |
| 8  | Belgium        | <a href="https://webapps.riziv-inami.fgov.be/SSPWebApplicationPublic/fr/Public/ProductSearch">https://webapps.riziv-inami.fgov.be/SSPWebApplicationPublic/fr/Public/ProductSearch</a>                                                                                                                                             |
| 9  | Luxembourg     | <a href="https://cns.public.lu/en/legislations/textes-coordonnes/liste-positive.html">https://cns.public.lu/en/legislations/textes-coordonnes/liste-positive.html</a>                                                                                                                                                             |
| 10 | Netherlands    | <a href="https://www.horizonscangeneesmiddelen.nl/geneesmiddelen/lorlatinib-oncologie-en-hematologie-longkanker/versie1">https://www.horizonscangeneesmiddelen.nl/geneesmiddelen/lorlatinib-oncologie-en-hematologie-longkanker/versie1</a>                                                                                       |
| 11 | Austria        | Pfizer Data on File                                                                                                                                                                                                                                                                                                               |
| 12 | Sweden         | <a href="https://www.tlv.se/beslut/beslut-lakemedel/begransad-subvention/arkiv/2019-09-30-lorviqua-ingar-i-hogkostnadsskyddet-med-begransning.html">https://www.tlv.se/beslut/beslut-lakemedel/begransad-subvention/arkiv/2019-09-30-lorviqua-ingar-i-hogkostnadsskyddet-med-begransning.html</a>                                 |
| 13 | Denmark        | <a href="https://medicinraadet.dk/anbefalinger-og-vejledninger/laegemidler-og-indikationsudvidelser/i-l/lorlatinib-lorviqua-ikke-smacellet-lungekraeft-alk-positiv">https://medicinraadet.dk/anbefalinger-og-vejledninger/laegemidler-og-indikationsudvidelser/i-l/lorlatinib-lorviqua-ikke-smacellet-lungekraeft-alk-positiv</a> |
| 14 | Norway         | <a href="https://nyemetoder.no/Documents/Rapporter/Lorlatinib%20(Lorviqua)_ID2018_092-%20hurtig%20metodevurdering.pdf">https://nyemetoder.no/Documents/Rapporter/Lorlatinib%20(Lorviqua)_ID2018_092-%20hurtig%20metodevurdering.pdf</a>                                                                                           |
| 15 | Finland        | <a href="https://www.kela.fi/laake1527">https://www.kela.fi/laake1527</a>                                                                                                                                                                                                                                                         |
| 16 | Ireland        | <a href="http://www.ncpe.ie/drugs/lorlatinib-lorviqua/">http://www.ncpe.ie/drugs/lorlatinib-lorviqua/</a>                                                                                                                                                                                                                         |
| 17 | Greece         | Pfizer Data on File                                                                                                                                                                                                                                                                                                               |
| 18 | Czech Republic | Pfizer Data on File                                                                                                                                                                                                                                                                                                               |
| 19 | Slovakia       | Pfizer Data on File                                                                                                                                                                                                                                                                                                               |
| 20 | Portugal       | <a href="https://extranet.infarmed.pt/INFOMED-fo/detalhes-medicamento.xhtml">https://extranet.infarmed.pt/INFOMED-fo/detalhes-medicamento.xhtml</a>                                                                                                                                                                               |
| 21 | South Korea    | <a href="https://www.hira.or.kr/bbsDummy.do?pgmid=HIRAA030014040000&amp;brdScnBltno=4&amp;brdBltno=46960&amp;pageIndex=1&amp;pageIndex2=1#none">https://www.hira.or.kr/bbsDummy.do?pgmid=HIRAA030014040000&amp;brdScnBltno=4&amp;brdBltno=46960&amp;pageIndex=1&amp;pageIndex2=1#none</a>                                         |
| 22 | Hungary*       | Pfizer Data on File                                                                                                                                                                                                                                                                                                               |
| 23 | Bulgaria       | <a href="https://www.ncpr.bg/images/rezume_na_dokladi/2022/26.07.2022/Resume_LORVIQUA_new.pdf">https://www.ncpr.bg/images/rezume_na_dokladi/2022/26.07.2022/Resume_LORVIQUA_new.pdf</a>                                                                                                                                           |
| 24 | Slovenia       | Pfizer Data on File                                                                                                                                                                                                                                                                                                               |
| 25 | Croatia        | Pfizer Data on File                                                                                                                                                                                                                                                                                                               |
| 26 | Singapore      | <a href="http://www.ace-hta.gov.sg/our-process-and-methods.html#health-techNology">http://www.ace-hta.gov.sg/our-process-and-methods.html#health-techNology</a>                                                                                                                                                                   |
| 27 | Taiwan         | <a href="https://www.nhi.gov.tw/Content_List.aspx?n=CD8AE4ECB980299F&amp;topn=5FE8C9FEAE863B46">https://www.nhi.gov.tw/Content_List.aspx?n=CD8AE4ECB980299F&amp;topn=5FE8C9FEAE863B46</a>                                                                                                                                         |

\*Access through the Named Patient Program (NPP). NPP in 2L is bridging solution till national reimbursement is granted to make innovative medicines available in case of declared medical unmet need.
